# Supplementary material for: Response of growth and physiological enzyme activities in Eriogyna pyretorum to various host plants
Source: PeerJ. 2024 Jul 8;12:e17680. doi: 10.7717/peerj.17680 (PMC11238723; doi:10.7717/peerj.17680)
Supplement: Supplemental Information 1 [file peerj-12-17680-s001.xlsx]

## Sheet:  development duration
	1st instar	2cd instar	3rd instar	4th instar	5th instar	6th instar	7th instar	8th instar	prepupal	total larval stage			1	1	1	2	2	2	3	3	3
	5.63636	4.54545	6.05	7.25	8.5	13.9	18.5263	23.25	11.0625	80.5882		1st instar	5.63636	6.38889	6.38095	5.78947	5.85	5.5	6.35386	6.09091	6.1
	6.38889	5.11111	6.27778	6.55556	7.88889	12.4444	16.75	22.6667	11.3846	83.7692		2cd instar	4.54545	5.11111	5.19048	5	5.2	5.5	6.09643	5.36364	6.1
	6.38095	5.19048	6.25	6.65	7.95	12.5	19.3333	22.8333	11.0625	83.0625		3rd instar	6.05	6.27778	6.25	5.38889	5.35	5.4375	6.78657	6.27273	5.9
C. officinarum (1)	a	b	a	b	a	b	a		b	a		4th instar	7.25	6.55556	6.65	7.16667	6.65	6.875	8.26429	7.63636	8.1
	5.78947	5	5.38889	7.16667	8.11111	12.6667	17.6471		12.2143	72.2857		5th instar	8.5	7.88889	7.95	8.11111	8.25	7.8125	9.07486	8.54545	8.2
	5.85	5.2	5.35	6.65	8.25	12.55	16.6		13.4	69.6		6th instar	13.9	12.4444	12.5	12.6667	12.55	13.1875	16.0191	16.7273	16.4
	5.5	5.5	5.4375	6.875	7.8125	13.1875	18.5		12.5455	72.2727		7th instar	18.5263	16.75	19.3333	17.6471	16.6	18.5	18.7778	18.8571	16.7143
L. formosana (2)	a	ab	b	b	a	b	a		a	c		8th instar	23.25	22.6667	22.8333
	6.35386	6.09643	6.78657	8.26429	9.07486	16.0191	18.7778		13.1687	75.8457		prepupal	11.0625	11.3846	11.0625	12.2143	13.4	12.5455	13.1687	11.8	11.5
	6.09091	5.36364	6.27273	7.63636	8.54545	16.7273	18.8571		11.8	74.2		larval stage	80.5882	83.7692	83.0625	72.2857	69.6	72.2727	75.8457	74.2	74
	6.1	6.1	5.9	8.1	8.2	16.4	16.7143		11.5	74
P. stenoptera (3)	a	a	a	a	a	a	a		ab	b

## Sheet:  Length
C. officinarum (1)	6.55	11.2	21.36	29.745	39.29	54.42	65.34	70.02	35.6429	10.5357
	6.57143	9.89333	17.76	29.0467	39.2333	49.8067	64.0867	71.7857	35.0167	10.4667
	6.6	9.55	18.525	29.7684	37.2	52.9333	65.6857	70.06	35.1222	10.4964
	a	a	a	a	b	b	a		a	b
L. formosana (2)	6.23077	9.45789	18.1526	30.35	42.4667	61.4278	75		38.1	11.8
	6.42857	9.12	19.27	30.43	45.605	59.165	67.0625		34.62	11.1333
	6.45833	8.56875	18.6562	29.0688	46.5625	60.6	72.3231		35.6727	10.7545
	a	b	a	a	a	a	a		a	a
P. stenoptera (3)	5.66667	8.58583	17.6467	24.9942	34.3383	46.9358	55.354		30.0242	9.73542
	5.83333	8.65944	14.405	20.1572	26.3811	37.4022	41.9829		29.2812	9.4225
	6.16667	8.485	16.555	24.2942	33.3733	46.4217	54.1775		28.4067	9.59042
	b	b	a	b	c	c	b		b	c

## Sheet: Weight
C. officinarum (1)	a	a	a	b	b	b	b		b
	0.002	0.0323727	0.112473	0.420655	1.007	2.16763	4.30515	5.53824	2.1925
	0.00206667	0.01985	0.0962286	0.370567	0.86288	1.88071	3.94601	5.61147	2.21275
	0.00201667	0.0181	0.116046	0.344632	0.8515	1.94625	4.09851	5.5012	2.31356
L. formosana (2)	a	a	a	a	a	a	a		a
	0.002	0.0239143	0.122019	0.464229	1.51756	3.30378	6.15311		3.06069
	0.002	0.03175	0.135417	0.473975	1.49994	3.30726	5.65439		2.621
	0.00204286	0.017875	0.129775	0.42355	1.47896	3.39405	5.80892		2.57018
P. stenoptera (3)	a	a	a	c	c	c	c		b
	0.002	0.0308	0.0763167	0.310667	0.725567	1.81736	3.74742		2.0447
	0.00206	0.0254625	0.07935	0.333688	0.738888	1.75477	3.56055		2.268
	0.00201667	0.0297625	0.07775	0.299655	0.735583	1.8091	3.6644		2.3466

## Sheet: head capsule width
C. officinarum (1)	0.892	1.489	2.218	3.133	4.126	5.04	5.515	6.88925
	0.905	1.474	2.265	3.128	3.975	4.937	5.5675	6.72225
	0.901	1.529	2.209	3.034	4.047	4.966	5.52	6.53275
	a	ab	b	b	b	b	b
L. formosana (2)	0.916	1.565	2.424	3.483	4.493	5.301	6.7025
	0.934	1.525	2.424	3.573	4.519	5.355	6.10325
	0.914	1.571	2.428	3.545	4.475	5.347	6.4165
	a	a	a	a	a	a	a
P. stenoptera (3)	0.821	1.494	2.017	3.038	3.836	4.83	5.418
	0.843	1.439	2.075	2.911	3.823	4.815	5.42333
	0.816	1.503	2.131	3.051	3.9	4.84167	5.34333
	b	b	c	b	c	c	b

## Sheet:  survival
		1st instar	2cd instar	3rd instar	4th instar	5th instar	6th instar	7th instar	8th instar		larval survival (Number of pupae/30)	prepupal (Last instar larvae successfully pupate)
C. officinarum (1)	1	73.3333	100	90.9091	100	100	100	95	21.0526		53.3333	84.2105
	1	60	100	100	100	100	100	88.8889	37.5		43.3333	92.8571
	1	70	100	95.2381	100	100	100	90	38.8889		56.6667	89.4737
		a		a				a			a	a
L. formosana (2)	2	63.3333	100	94.7368	100	100	100	94.4444			46.6667	77.7778
	2	66.6667	100	100	100	100	100	75			50	75
	2	53.3333	100	100	100	100	100	75			36.6667	73.3333
		a		a				ab			a	b
P. stenoptera (3)	3	46.6667	100	92.8571	92.3077	100	100	75			26.6667	80
	3	40	100	83.3333	100	100	100	80			23.3333	77.7778
	3	36.6667	100	90.9091	100	100	100	70			16.6667	71.4286
		b		b				b			b	b

## Sheet: enzymes
						C. officinarum			L. formosana			P. stenoptera
					CYP450	0.023225	0.025214	0.033228	0.013276	0.016483	0.014536	0.009978	0.014447	0.014279
						a			a			b
					CarE	20.6154	20.7522	23.2529	11.0912	11.2416	9.57143	11.725	11.0353	13.3721
						a			b			b
					CAT	50.3672	38.9631	41.3431	23.5339	25.5358	22.5115	66.0658	55.3284	83.1736
						b			c			a
					GST	727.154	779.558	685.941	254.865	368.926	245.51	654.062	509.608	978.837
						a			b			a
					POD	2161.54	2672.57	1929.41	2572.18	3543.62	3057.14	437.5	509.804	339.535
						b			a			c
					SOD	385.86	242.773	369.106	393.082	552.108	365.546	277.077	291.219	373.585
						a			a			a
					α-amylase	2.86192	2.93584	2.43429	0.881154	2.08586	1.81543	1.39841	1.08604	2.55765
						a			a			a
					trypsin	103.294	172.035	127.647	43.5135	61.2752	48.3265	116	172.471	278.139
						ab			b			a
					LPS	10.1998	16.2529	6.95811	12.2817	15.2192	19.5664	14.9805	9.03334	11.8572
						a			a			a

## Sheet: metabolites and nutrient
						C. officinarum			L. formosana			P. stenoptera
				mg/g	Soluble sugar content SSC	7.2072	6.9966	6.3414	6.9732	6.8328	6.3648	5.8968	6.9849	6.3999			Soluble sugar content SSC	Soluble protein content SPC	Total phenolics content TPC	tannin content TC	flavonoid content FC
						6.8484	0.368669	a	6.7236	0.260104	a	6.4272	0.544563	a		1	7.2072	2.16011	29.6395	1.21354	56.2899
																1	6.9966	1.3263	27.6256	1.29271	64.069
				mg/g	Soluble protein content SPC	2.16011	1.3263	2.22519	1.0608	2.24183	1.1431	1	0.494687	0.807137		1	6.3414	2.22519	26.694	1.01257	49.3759
						1.90387	0.409265	a	1.48191	0.538392	ab	0.767275	0.20821	b		2	6.9732	1.0608	34	1.07956	56.8228
																2	6.8328	2.24183	31.8501	1.26835	60.2274
				mg/g	Total phenolics content TPC	29.6395	27.6256	26.694	34	31.8501	33.2561	30.9914	25.4184	28.647		2	6.3648	1.1431	33.2561	1.26226	49.3046
						27.9864	1.22928	b	33.0354	0.891444	a	28.3523	2.2847	b		3	5.8968	1	30.9914	1.41451	46.2494
																3	6.9849	0.494687	25.4184	1.37797	54.4154
				mg/g	tannin content TC	1.21354	1.29271	1.01257	1.07956	1.26835	1.26226	1.41451	1.37797	1.3597		3	6.3999	0.807137	28.647	1.3597	59.8035
						1.17294	0.117915	a	1.20339	0.0875963	a	1.38406	0.0227867	a
				mg/g	flavonoid content FC	56.2899	64.069	49.3759	56.8228	60.2274	49.3046	46.2494	54.4154	59.8035
						56.5782	6.00189	a	55.4516	4.56338	a	53.4894	5.57203	a

## Sheet: growth status
			total developmental duration	larvae survival rate	7th instar larval length	pupal length	7th instar larval weight	pupal weight
			TDD	LSR	7ILL	PL	7ILW	PW
		C. officinarum	80.5882	53.3333	65.34	35.6429	4.30515	2.1925
			83.7692	43.3333	64.0867	35.0167	3.94601	2.21275
			83.0625	56.6667	65.6857	35.1222	4.09851	2.31356
		L. formosana	72.2857	46.6667	75	38.1	6.15311	3.06069
			69.6	50	67.0625	34.62	5.65439	2.621
			72.2727	36.6667	72.3231	35.6727	5.80892	2.57018
		P. stenoptera	75.8457	26.6667	55.354	30.0242	3.74742	2.0447
			74.2	23.3333	41.9829	29.2812	3.56055	2.268
			74	16.6667	54.1775	28.4067	3.6644	2.3466
